# Supplementary material
Source: PubMed Central journal article supplement (PMC2702122)
Supplement: NIHMS120471-supplement-1_si_001.pdf [file NIHMS120471-supplement-1_si_001.pdf]

# Supporting Information

## Biosynthesis of the Sesquiterpene Botrydial in *Botrytis cinerea*. Mechanism and Stereochemistry of the Enzymatic Formation of Presilphiperfolan-8-ol

Chieh-Mei Wang, Russell Hopson, Xin Lin and David E. Cane\*

Department of Chemistry, Box H, Brown University, Providence, Rhode Island 02912-9108

E-mail: David\_Cane@brown.edu

**Materials and Methods.** General materials and methods were as previously described.<sup>1</sup> (3*S*)-Nerolidyl diphosphate, (3*RS*)-nerolidyl diphosphate, (3*S*)-(1*Z*)-[1-<sup>2</sup>H]nerolidyl diphosphate (77.6% d<sub>1</sub>, 22.4% d<sub>2</sub>) and (3*RS*)-(1*Z*)-[1-<sup>2</sup>H]nerolidyl diphosphate (14.3% d<sub>0</sub>, 82.1% d<sub>1</sub>, 3.6% d<sub>2</sub>) were prepared as previously described.<sup>2,3</sup> [13,13,13-<sup>2</sup>H<sub>3</sub>]FPP (**2d**) were prepared by Dr. P. C. Prabhakaran.<sup>4</sup> Presilphiperfolan-8β-ol (**3**) isolated from *E. staechifolium* was a gift from Drs. Robert M. Coates and Juan A. Faldos of the University of Illinois, Urbana, IL. Recombinant BcBOT2 protein was purified as previously described.<sup>1</sup> Preparative-scale incubation of recombinant BcBOT2 protein with deuterated FPP and NPP samples was carried out as previously described.<sup>1</sup> Standard GC-MS instruments and temperature programs were used as previously described.<sup>1</sup> Chiral capillary GC-MS spectra were recorded at 70 eV EI, operating in positive ion mode, with a HYDRODEX β-6TBDM heptakis-(2,3-di-*O*-methyl-6-*O*-*t*-butyldimethylsilyl)-β-cyclodextrin capillary column (25 m × 0.25 mm), using a temperature program of 100-160 °C, 2.3 °C min<sup>-1</sup> (10 min hold) followed by 160-200 °C, 10 °C min<sup>-1</sup> (2 min hold).

**NMR – General.** NMR spectra were obtained on Bruker Avance NMR spectrometers operating at 399.85 MHz  $^1\text{H}$  frequency. Chemical shifts are referenced to  $\text{C}_6\text{D}_6$  at room temperature.

**Presilphiperfolan-8 $\beta$ -ol (3).** NMR assignments.  $^1\text{H}$  NMR ( $\text{C}_6\text{D}_6$ , 399.85 MHz)  $\delta$  2.34 (m, 1 H, H-2 $\beta$ ), 2.19 (d,  $J = 11.4$  Hz, 1 H, H-5 $\beta$ ), 2.12 (m, 1 H, H-3 $\beta$ ), 1.83 (m, 1 H, H-2 $\alpha$ ), 1.53 (m, 1 H, H-10 $\alpha$ ), 1.51 (m, 1 H, H-11 $\beta$ ), 1.42 (s, 3 H, H-14), 1.33 (m, 1 H, H-7), 1.33 (m, 1 H, H-11 $\alpha$ ), 1.29 (m, 1 H, H-9), 1.23 (d,  $J = 11.4$  Hz, 1 H, H-5 $\alpha$ ), 1.21 (m, 1 H, H-3 $\alpha$ ), 1.21 (s, 3 H, H-13), 1.16 (s, 3 H, H-12), 1.03 (m, 1 H, H-1), 0.91 (m, 1 H, H-10 $\beta$ ), 0.88 (d,  $J = 6.4$  Hz, 3 H, H-15);  $^{13}\text{C}$  NMR ( $\text{C}_6\text{D}_6$ , 399.85 MHz, ppm): 96.2 (C, C-8), 56.4 (C, C-4), 52.3 (CH, C-7), 50.2 (CH, C-1), 49.4 ( $\text{CH}_2$ , C-5), 48.0 (C, C-6), 37.5 (CH, C-9), 36.4 ( $\text{CH}_3$ , C-14), 34.5 ( $\text{CH}_2$ , C-10), 34.0 ( $\text{CH}_2$ , C-3), 33.3 ( $\text{CH}_2$ , C-2), 28.1 ( $\text{CH}_3$ , C-12), 28.0 ( $\text{CH}_2$ , C-13), 27.1 ( $\text{CH}_2$ , C-11), 21.8 ( $\text{CH}_3$ , C-15). Figure S2 shows the  $^1\text{H}$  NMR spectrum of the enzymatically-generated presilphiperfolan-8 $\beta$ -ol (**3**), which was shown to be identical with the authentic sample of **3** as described previously.<sup>1</sup> (Figures S3-S7 show the  $^{13}\text{C}$  and 2D NMR spectra of the reference sample, which contained an unknown impurity that displayed a characteristic ethyl pattern with two  $^1\text{H}$  signals ( $\delta$  2.43 q,  $\delta$  1.00 t) correlated with two  $^{13}\text{C}$  signals (46.7 and 12.3 ppm)).

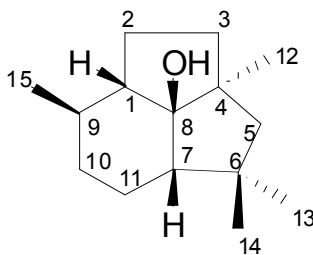

**Figure S1.** Presilphiperfolan-8 $\beta$ -ol (**3**).

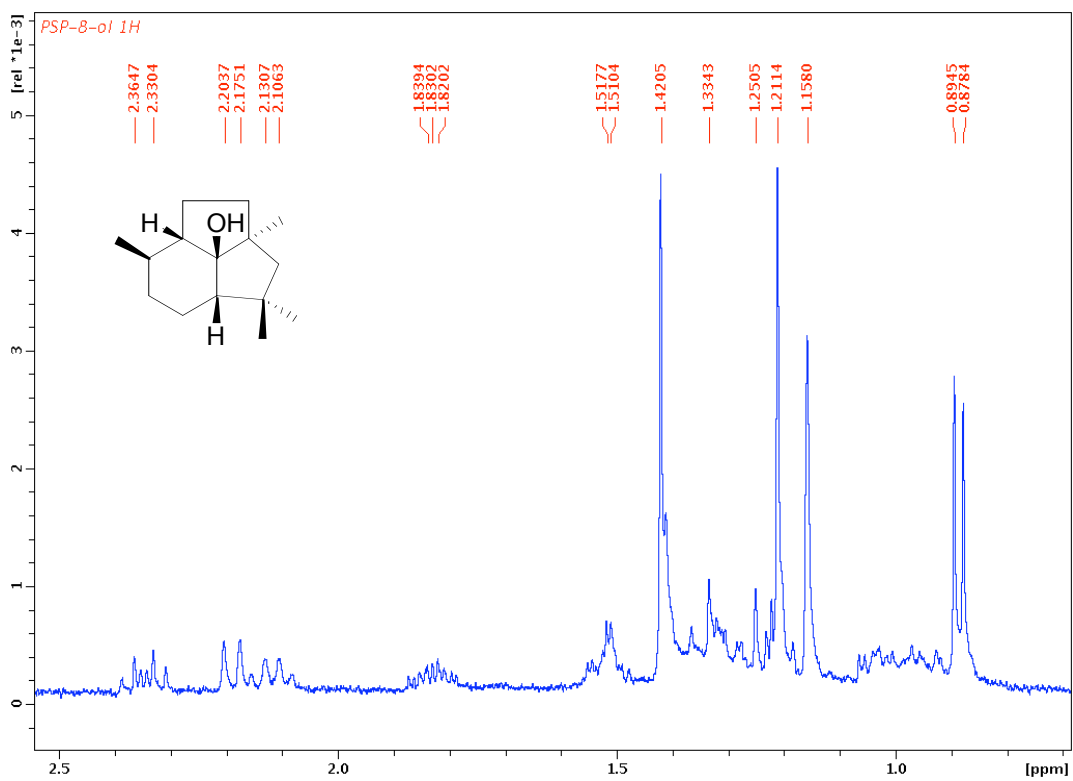

**Figure S2.**  $^1\text{H}$  NMR ( $\text{C}_6\text{D}_6$ , 399.85 MHz) spectrum of enzymatically generated presilphiperfolan-8 $\beta$ -ol (3).

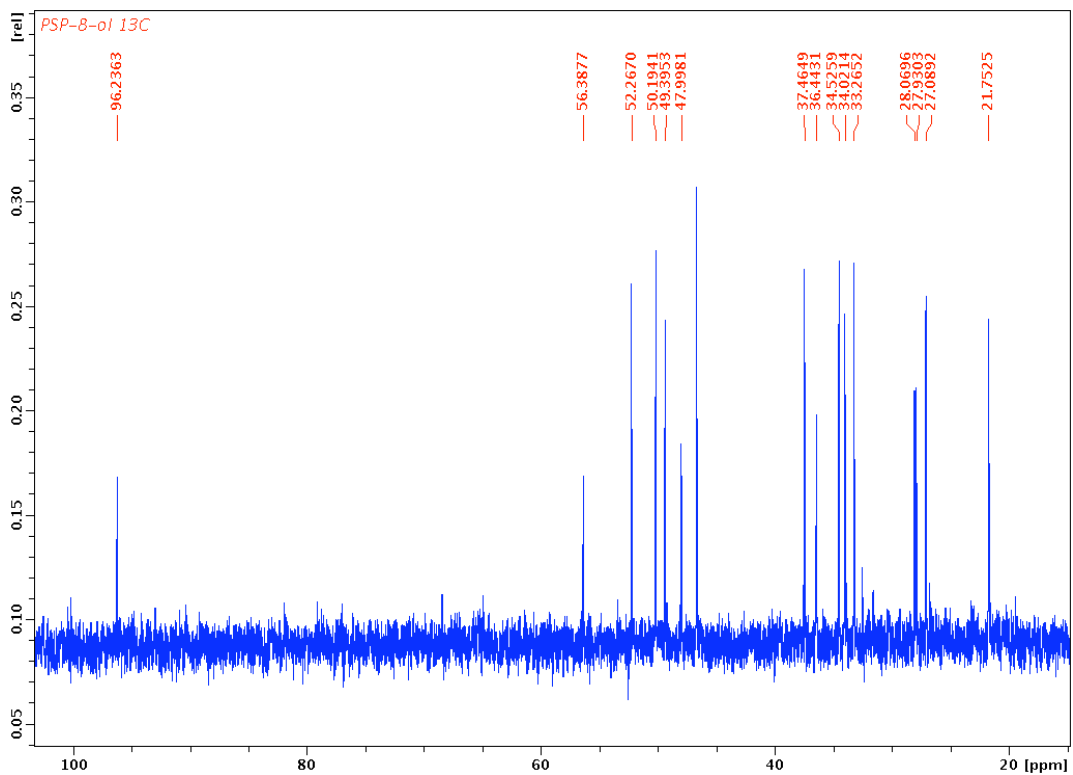

**Figure S3.**  $^{13}\text{C}$  NMR ( $\text{C}_6\text{D}_6$ , 100.61 MHz) spectrum of enzymatically generated presilphiperfolan-8 $\beta$ -ol (3).

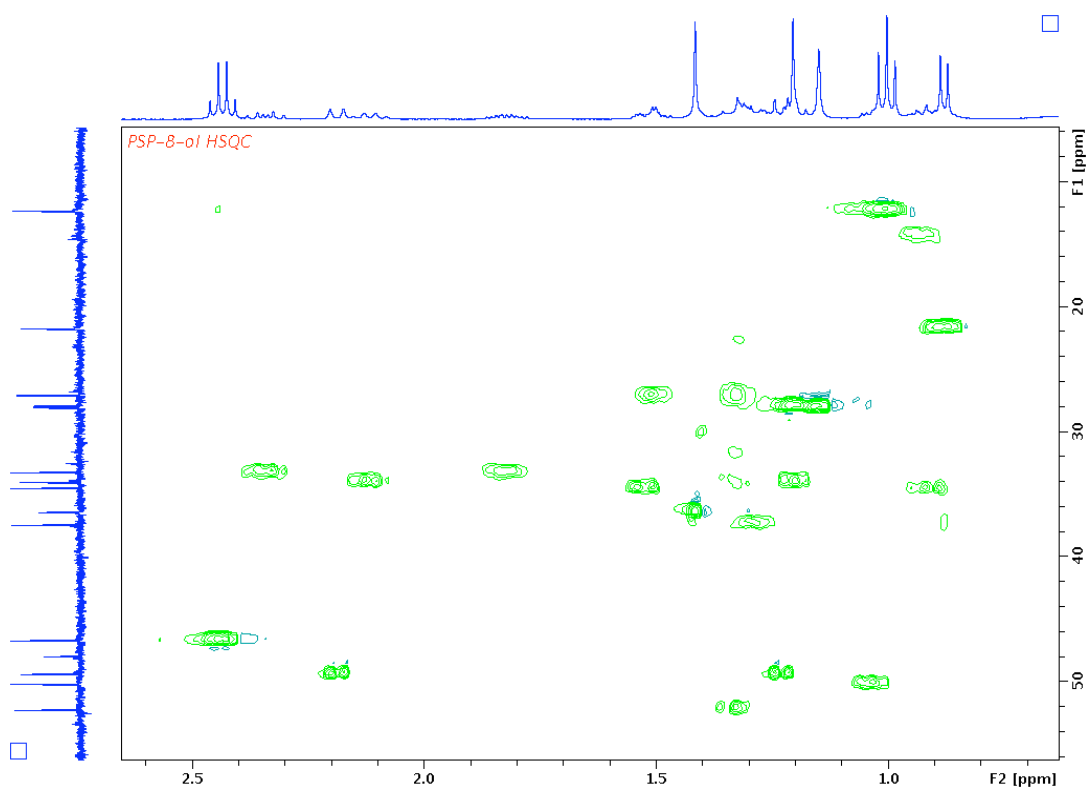

**Figure S4.** HSQC NMR ( $C_6D_6$ , 399.85 MHz, 100.54 MHz) spectrum of presilphiperfolan-8 $\beta$ -ol (**3**).

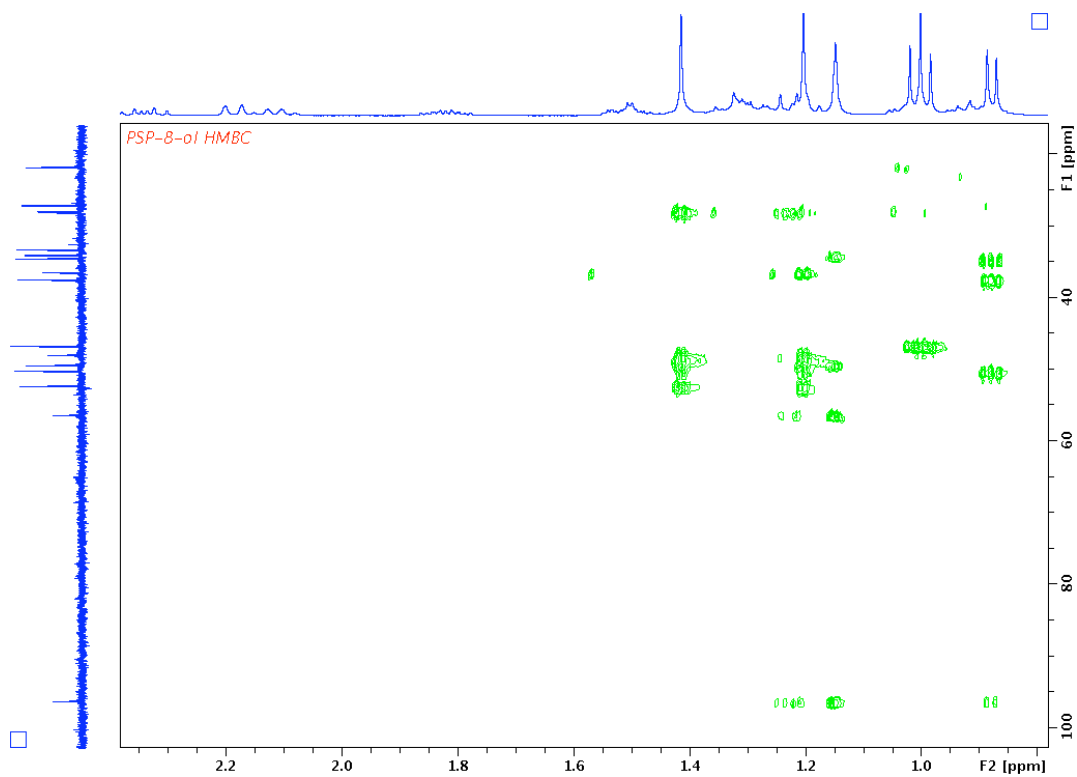

**Figure S5.** HMBC NMR ( $C_6D_6$ , 399.85 MHz, 100.54 MHz) spectrum of presilphiperfolan-8 $\beta$ -ol (**3**).

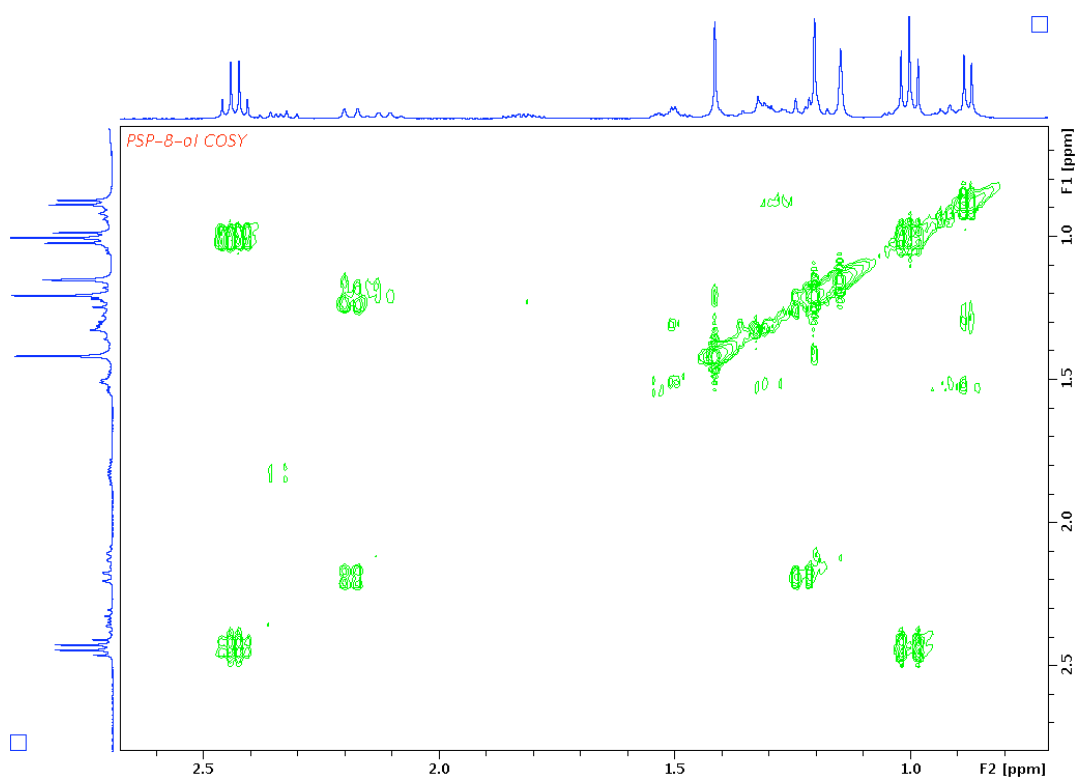

**Figure S6.**  $^1\text{H}$ - $^1\text{H}$  COSY NMR ( $\text{C}_6\text{D}_6$ , 399.85 MHz) spectrum of presilphiperfolan-8 $\beta$ -ol (**3**).

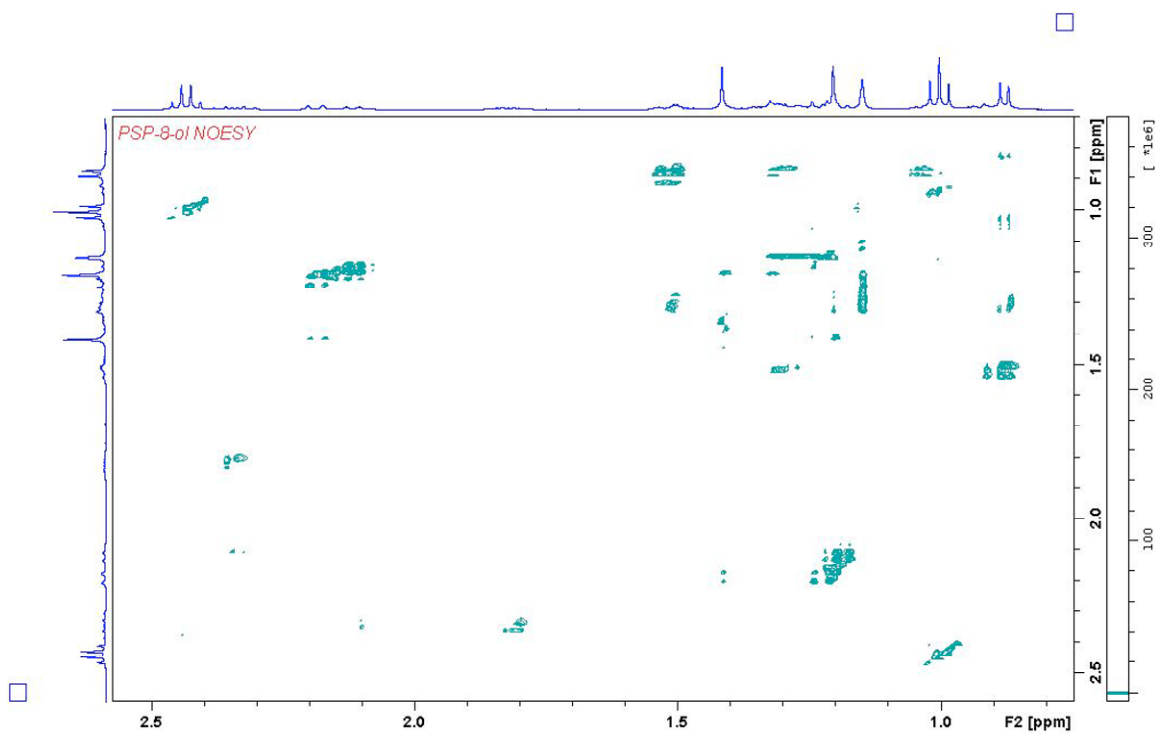

**Figure S7.** NOESY NMR ( $\text{C}_6\text{D}_6$ , 399.85 MHz) spectrum of presilphiperfolan-8 $\beta$ -ol (**3**).

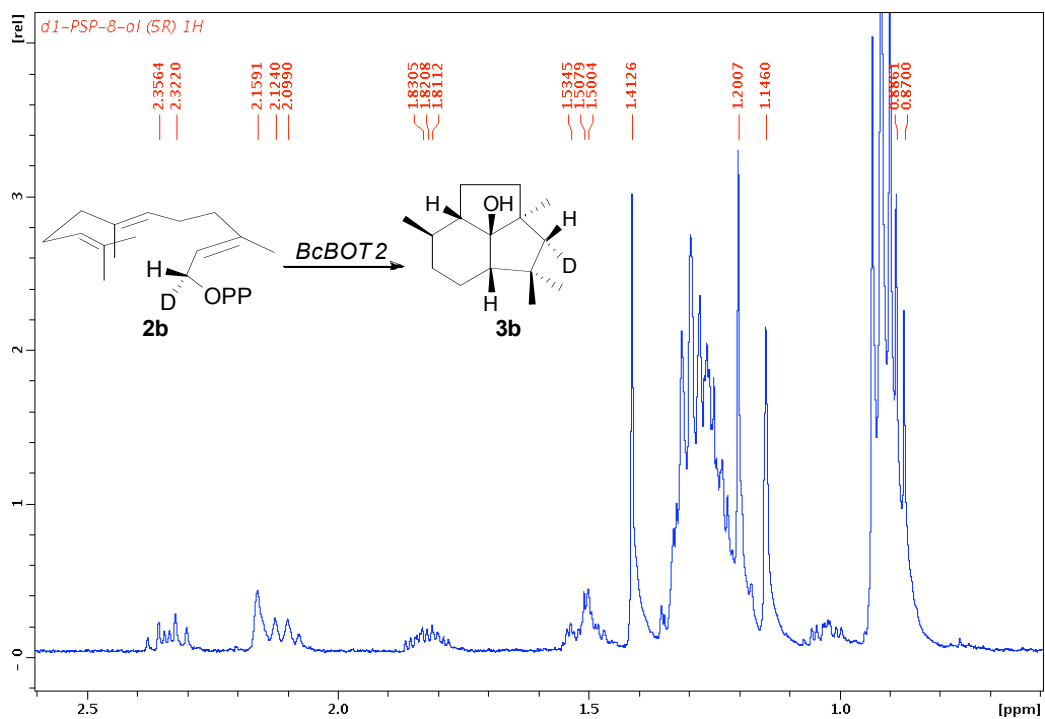

**Figure S8.** <sup>1</sup>H NMR (C<sub>6</sub>D<sub>6</sub>, 399.85 MHz) spectrum of (5*R*)-[5α-<sup>2</sup>H]presilphiperfolan-8β-ol (**3b**) derived from (1*R*)-[1-<sup>2</sup>H]FPP (**2b**). (The additional peaks at δ 0.9 (t) and 1.25 (m) are due to residual pentane in the 1-2 mg sample of **3b**.)

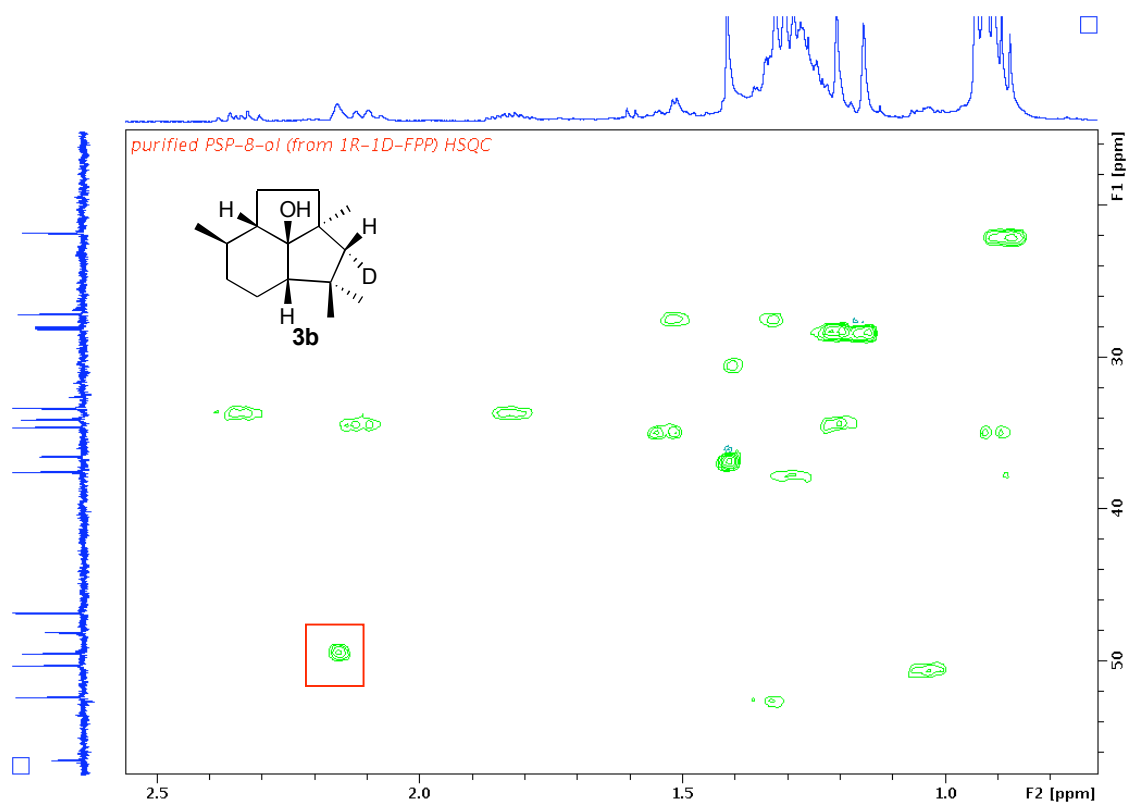

**Figure S9.** HSQC NMR ( $C_6D_6$ , 399.85 MHz, 100.54 MHz) spectrum of (5*R*)-[5 $\alpha$ - $^2H$ ]presilphiperfolan-8 $\beta$ -ol (**3b**) from (1*R*)-[1- $^2H$ ]FPP (**2b**). The cross-peak between H-5 $\beta$  ( $\delta$  2.16) and C-5 (49.4 ppm) is framed in red. (The additional peaks at  $\delta$  0.9 (t) and 1.25 (m) are due to residual pentane in the 1-2 mg sample of **3b**.)

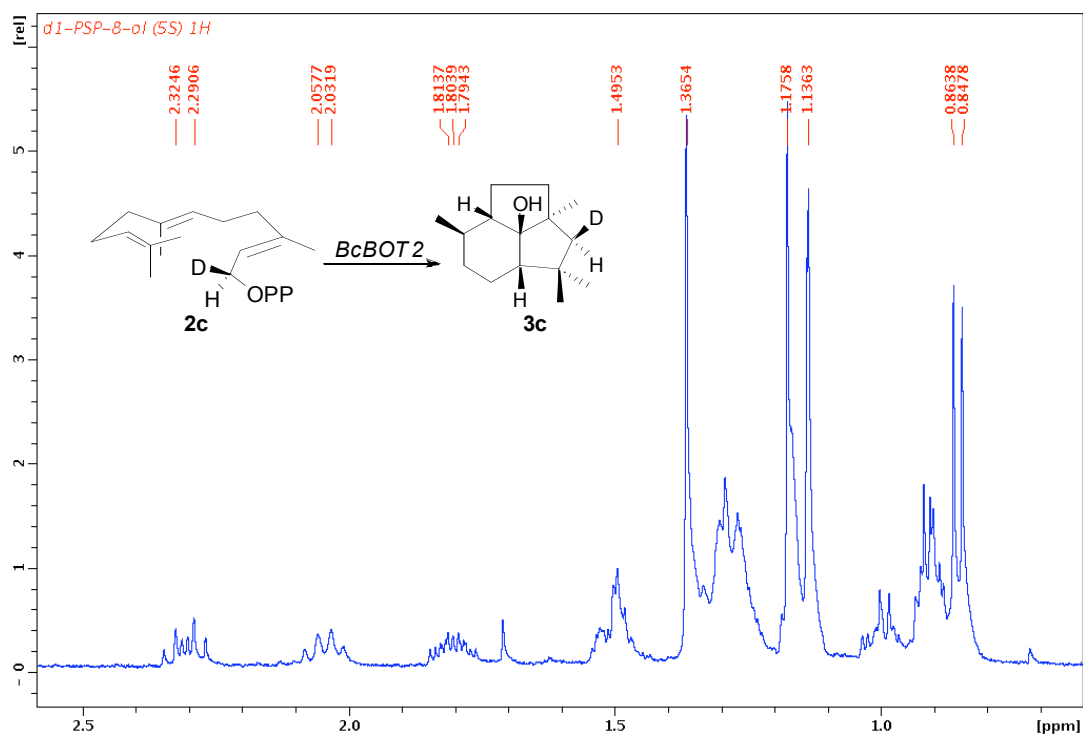

**Figure S10.** <sup>1</sup>H NMR (C<sub>6</sub>D<sub>6</sub>, 399.85 MHz) spectrum of (5*S*)-[5β-<sup>2</sup>H]presilphiperfolan-8β-ol (**3c**) derived from (1*S*)-[1-<sup>2</sup>H]FPP (**2c**). (The additional peaks at δ 0.9 (t) and 1.25 (m) are due to residual pentane in the 1-2 mg sample of **3c**.)



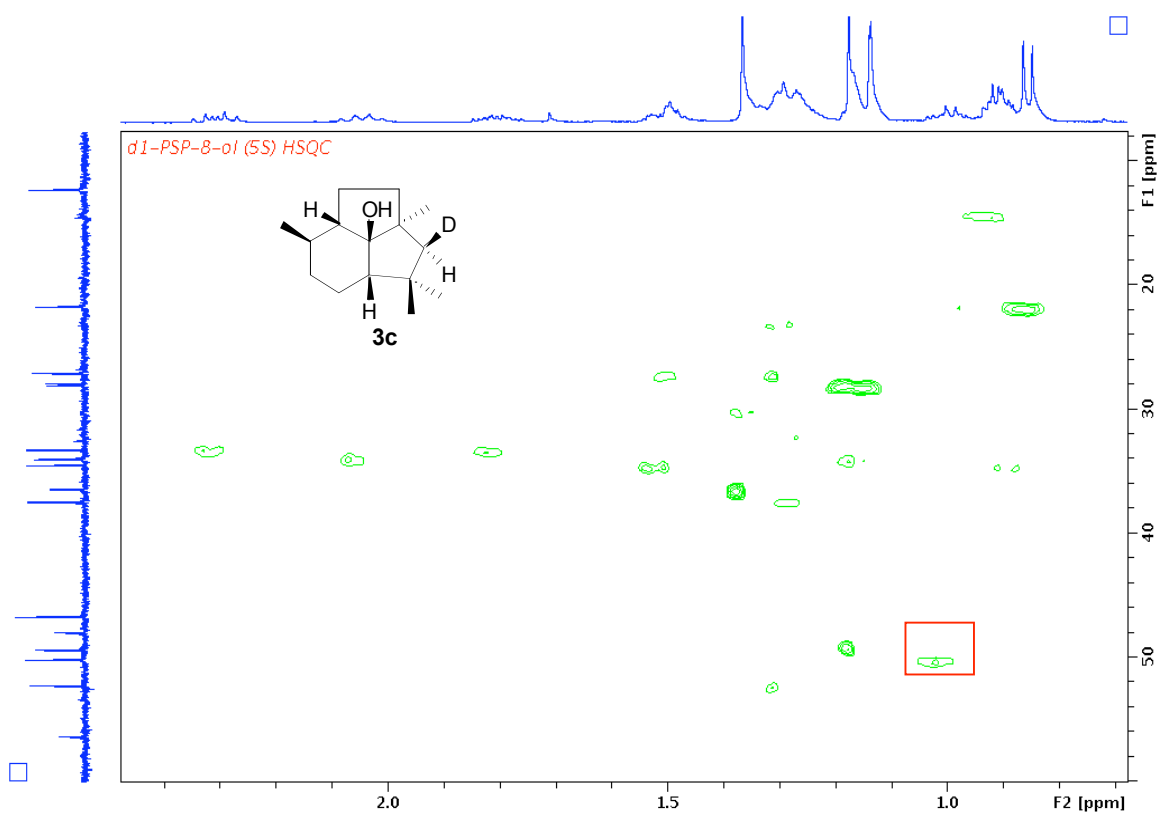

**Figure S11.** HSQC NMR ( $C_6D_6$ , 399.85 MHz, 100.54 MHz) spectrum of (5*S*)-[5 $\beta$ - $^2H$ ]presilphiperfolan-8 $\beta$ -ol (**3c**) from (1*S*)-[1- $^2H$ ]FPP (**2c**). The cross-peak between H-5 $\alpha$  ( $\delta$  1.18) and C-5 (49.4 ppm) is framed in red. (The additional peaks at  $\delta$  0.9 (t) and 1.25 (m) are due to residual pentane in the 1-2 mg sample of **3c**.)

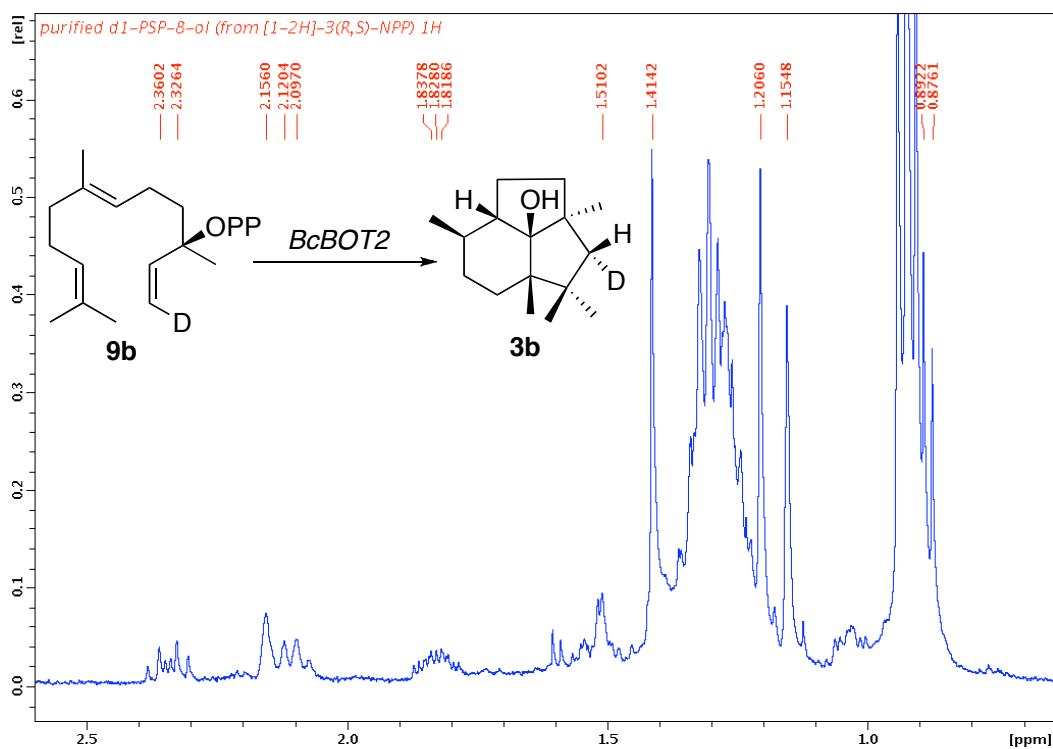

**Figure S12.**  $^1\text{H}$  NMR ( $\text{C}_6\text{D}_6$ , 399.85 MHz) spectrum of  $(5R)$ - $[5\alpha\text{-}^2\text{H}]$ presilphiperfolan- $8\beta$ -ol (**3b**) derived from  $(3RS)$ - $(Z)$ - $[1\text{-}^2\text{H}]$ NPP (**9b**). (The additional peaks at  $\delta$  0.9 (t) and 1.25 (m) are due to residual pentane in the 1-2 mg sample of **3b**.)

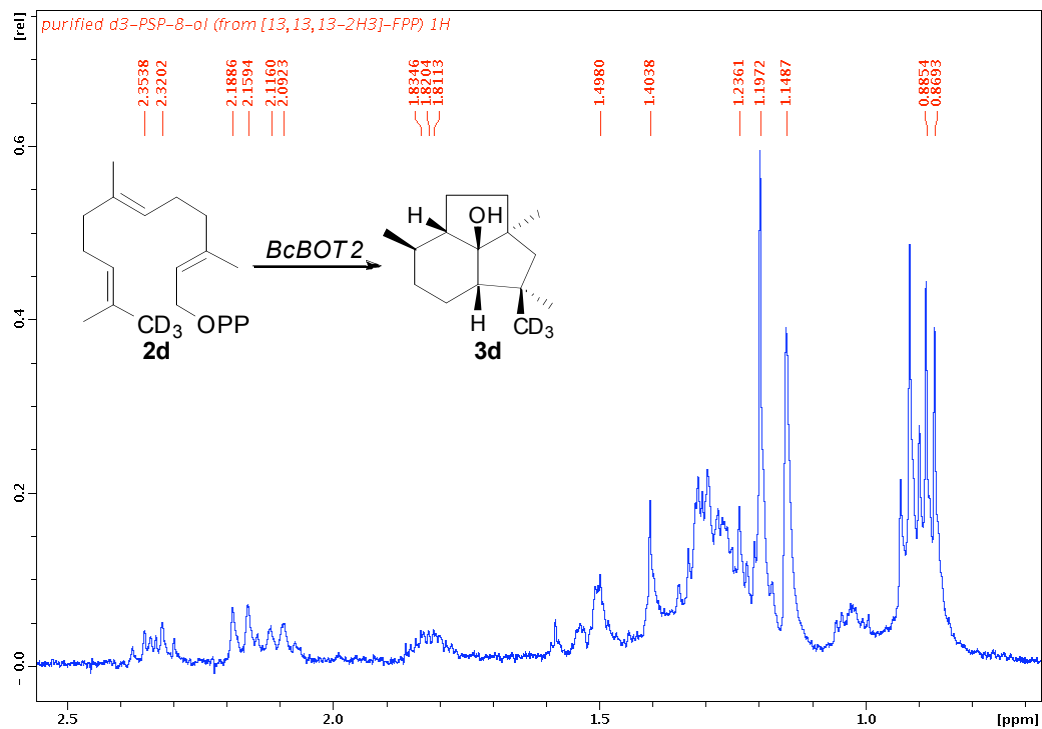

**Figure S13.**  $^1\text{H}$  NMR ( $\text{C}_6\text{D}_6$ , 399.85 MHz) spectrum of  $[14,14,14\text{-}^2\text{H}_3]$ presilphiperfolan- $8\beta$ -ol (**3d**) derived from  $[13,13,13\text{-}^2\text{H}_3]$ FPP (**2d**). (The additional peaks at  $\delta$  0.9 (t) and 1.25 (m) are due to residual pentane in the 1-2 mg sample of **2d**.)

**Competitive incubation of (3S)-(1Z)-[1-<sup>2</sup>H]nerolidyl diphosphate and (3RS)-nerolidyl diphosphate with BcBOT2.** A mixture of (3S)-(1Z)-[1-<sup>2</sup>H]nerolidyl diphosphate (77.6%  $d_1$ , 22.4%  $d_2$ ; 10 mM, 12  $\mu$ L) and (3RS)-nerolidyl diphosphate solution (10 mM, 12  $\mu$ L) was incubated with purified recombinant BcBOT2 (1  $\mu$ M) in 4 mL of assay buffer [50 mM PIPES, 5 mM MgCl<sub>2</sub>, 100 mM NaCl, 5 mM of  $\beta$ -mercaptoethanol, pH 7.0] at 30 °C for 5 h. Meanwhile, an identical NPP mixture was hydrolyzed with excess apyrase and phosphatase<sup>5</sup> followed by extraction with diethyl ether, and the concentrated ether extract was analyzed by chiral GC–MS. The precise ratio of (3R)- to (3S)-NPP in the mixture was determined to be 1:1.82 (3R)-*trans*-nerolidol ( $t_R$  32.54 min) to (3S)-*trans*-nerolidol ( $t_R$  33.05 min), corresponding to a calculated molar ratio of (3S)-(1Z)-[1-<sup>2</sup>H]nerolidyl diphosphate and (3RS)-nerolidyl diphosphate mixture of 1: 1.48. The BcBOT2 incubation mixture was extracted with HPLC-grade dichloromethane and the deuterium content of the resulting presilphiperfolan-8 $\beta$ -ol was analyzed by GC-MS/SIM of the  $m/z$  222, 223, and 224 peaks to give a  $d_0:d_1$  ratio of 95:5. After correction for the ratio of enantiomers in the NPP mixture and the isotopic enrichment of the (3S)-(1Z)-[1-<sup>2</sup>H]NPP, the stereochemical preference for (3R)-NPP over (3S)-NPP was calculated to be 9.46:1.

**Competitive incubation of (3S)-nerolidyl diphosphate and (3RS)-(1Z)-[1-<sup>2</sup>H]nerolidyl diphosphate with BcBOT2.** A mixture of (3S)-nerolidyl diphosphate (10 mM, 12  $\mu$ L) and (3RS)-(1Z)-[1-<sup>2</sup>H]nerolidyl diphosphate (14.3%  $d_0$ , 82.1%  $d_1$ , 3.6%  $d_2$ ; 10 mM, 12  $\mu$ L) was incubated with purified recombinant BcBOT2 (1 $\mu$ M) in 4 mL of assay buffer at 30 °C for 5 h. Parallel phosphatase/apyrase hydrolysis and GC–MS analysis was carried out as described above and gave an overall (3R)- to (3S)-NPP ratio of 1:7.11 and a calculated molar ratio of (3RS)-(1Z)-[1-<sup>2</sup>H]nerolidyl diphosphate to (3S)-nerolidyl diphosphate of 1: 6.04. GC–MS/SIM analysis of the resulting **3** gave a  $d_0:d_1$  ratio of 1:1.35. After correction for the enantiomeric enrichment and the deuterium content of the original NPP mixture, the stereochemical preference for (3R)-NPP over (3S)-NPP was calculated to be 11.94:1.

**Incubation of (3RS)-(1Z)-nerolidyl diphosphate (NPP) with BcBOT2 and GC analysis.** Purified recombinant BcBOT2 (1 $\mu$ M) was incubated with 60 $\mu$ M of (3RS)-(1Z)-NPP in 4 mL of assay buffer, overlaid with 4 mL HPLC-grade pentane, at 30 °C for 5 h. The reaction mixture was extracted with HPLC-grade dichloromethane, and the combined organic extract was dried, concentrated, and analyzed by GC-MS (Figure S14). The analysis of dichloromethane-extractable products revealed the formation of  $\beta$ -farnesene ( $t_R$  8.84 min,  $m/z$  204, 40.2%) and presilphiperfolan-8 $\beta$ -ol (**3**) ( $t_R$  9.83 min,  $m/z$  222, 28.5%) as two major products. A trace amount of nerolidol ( $t_R$  9.52min,  $m/z$  222, 7.1%) and one unknown sesquiterpene (r.t. 9.16,  $m/z$  204, 7.2%), possibly  $\alpha$ -bisabolene as identified by comparison of mass spectra with known standards in the MassFinder 3.0 Database (<http://www.massfinder.com>), was also detectable.

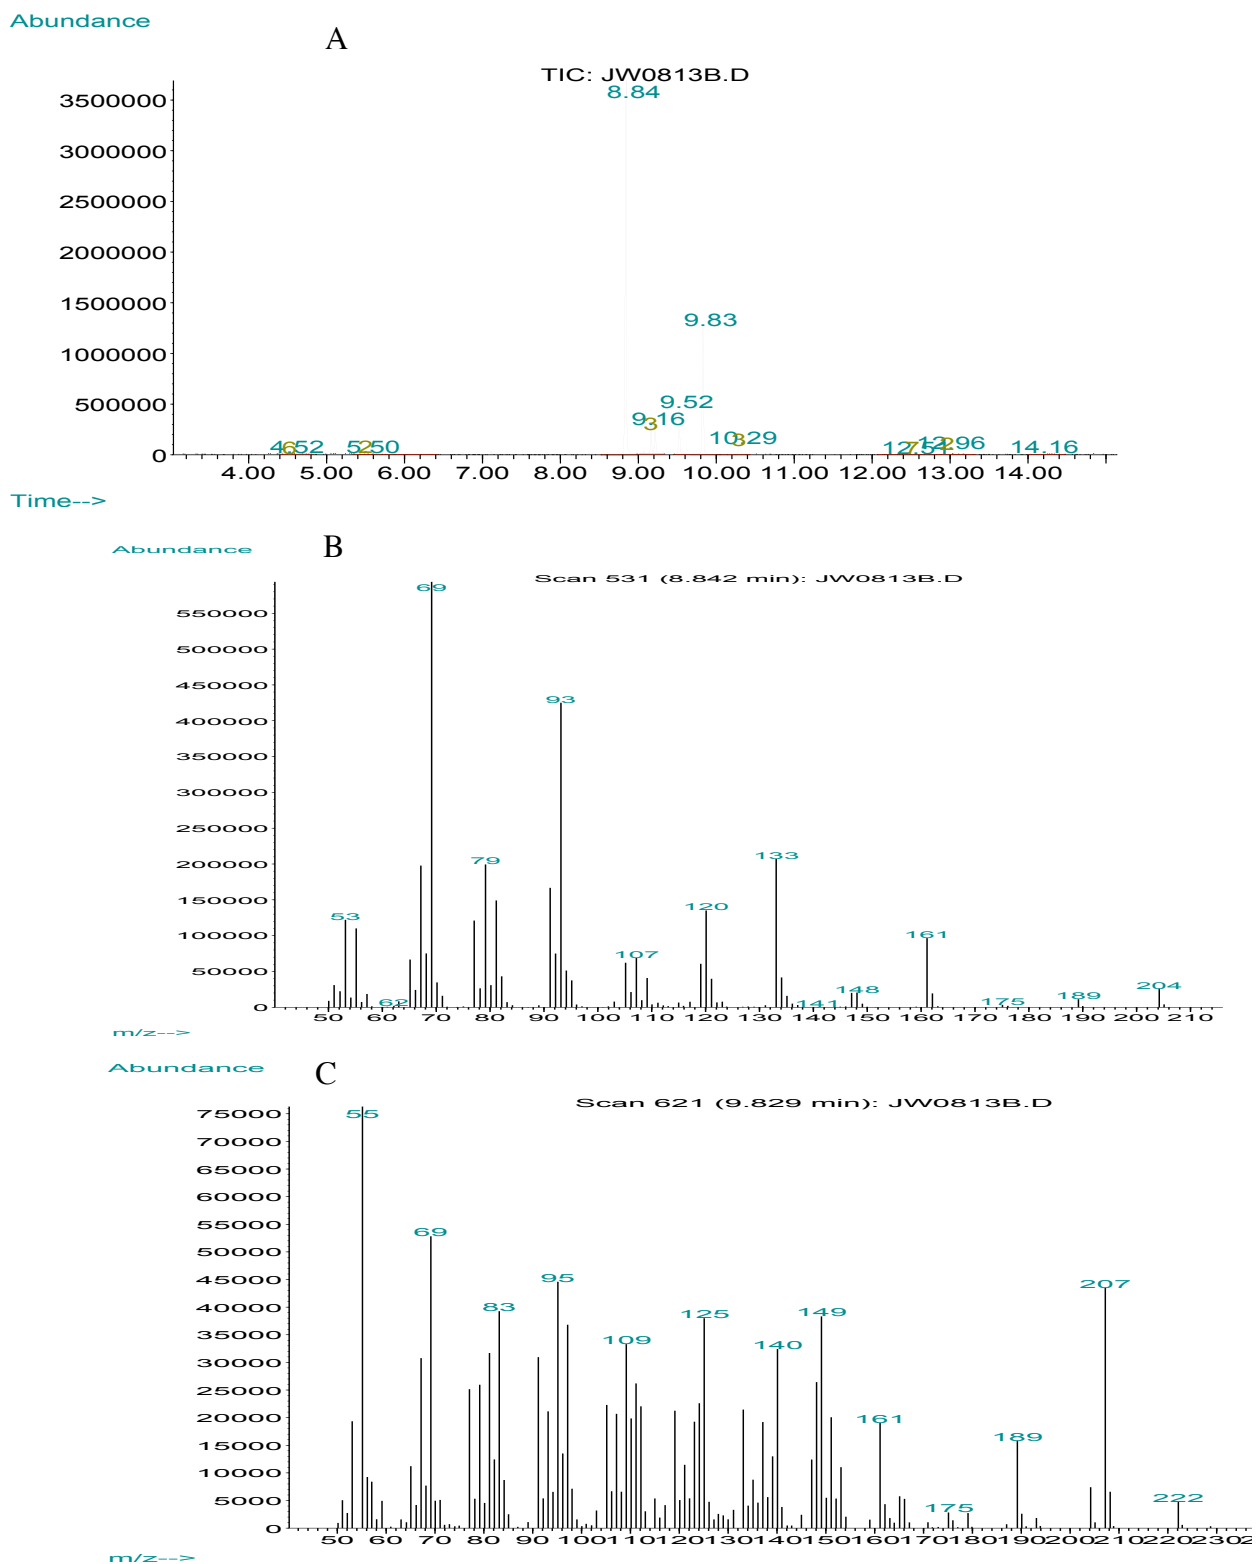

**Figure S14.** GC-MS spectra of enzymatic products from incubation of (3*RS*)-(1*Z*)-nerolidyl diphosphate with BcBOT2. A) GC/TIC; B) MS of  $\beta$ -farnesene,  $t_R$  8.84 min; C) MS of presilphiperfolan-8 $\beta$ -ol (**3**),  $t_R$  9.83 min.

## References

- (1) Pinedo, C.; Wang, C.-M.; Pradier, J.-M.; Dalmais, B.; Choquer, M.; Pêcheur, P. L.; Morgant, G.; Collado, I. G.; Cane, D. E.; Viaud, M. *ACS. Chem. Biol.* **2008**, *3*, 791-801.
- (2) Cane, D. E.; Iyengar, R.; Shiao, M.-S. *J. Am. Chem. Soc.* **1981**, *103*, 914-931.
- (3) Cane, D. E.; Ha, H. J. *J. Am. Chem. Soc.* **1988**, *110*, 6865-6870.
- (4) Cane, D. E.; Prabhakaran, P. C.; Oliver, J. S.; McIlwaine, D. B. *J. Am. Chem. Soc.* **1990**, *112*, 3209-3210.
- (5) Croteau, R., and Cane, D. E. *Methods in Enzymology* **1985**, *110*, 383-405.
